# Supplementary material for: Geo-Environment Vulnerability Assessment of Multiple Geohazards Using VWT-AHP: A Case Study of the Pearl River Delta, China
Source: MDPI journal article supplement (doi:10.3390/rs15205007), 2023-10-18
Supplement: s1 [file s1]

# **Geo-Environment Vulnerability Assessment of Multiple Geohazards Using VWT-AHP: A Case Study of the Pearl River Delta, China**

## **Supplementary Materials**

**Peng Huang, Xiaoyu Wu, Chuanming Ma \* and Aiguo Zhou**

School of Environmental Studies, China University of Geosciences,  
Wuhan 430000, China

\* Correspondence: machuanming@cug.edu.cn; Tel.: +86-027-6788-3159

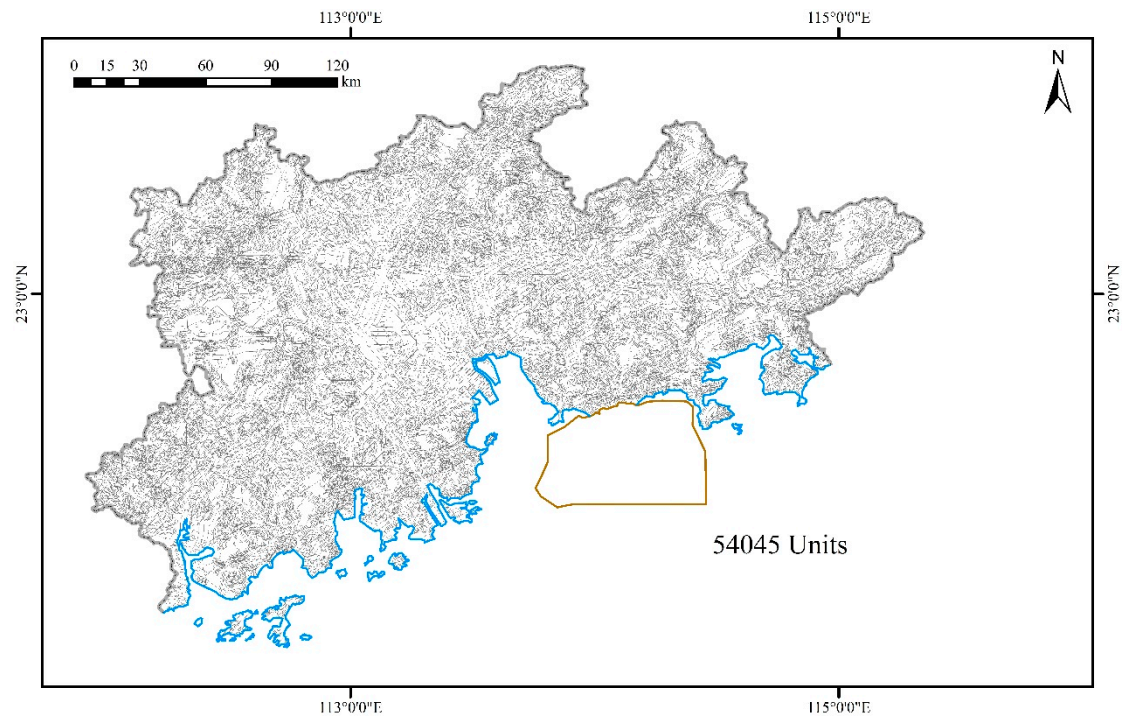

**Figure S1 Distribution map of assessment units of landslide and collapse susceptibility**

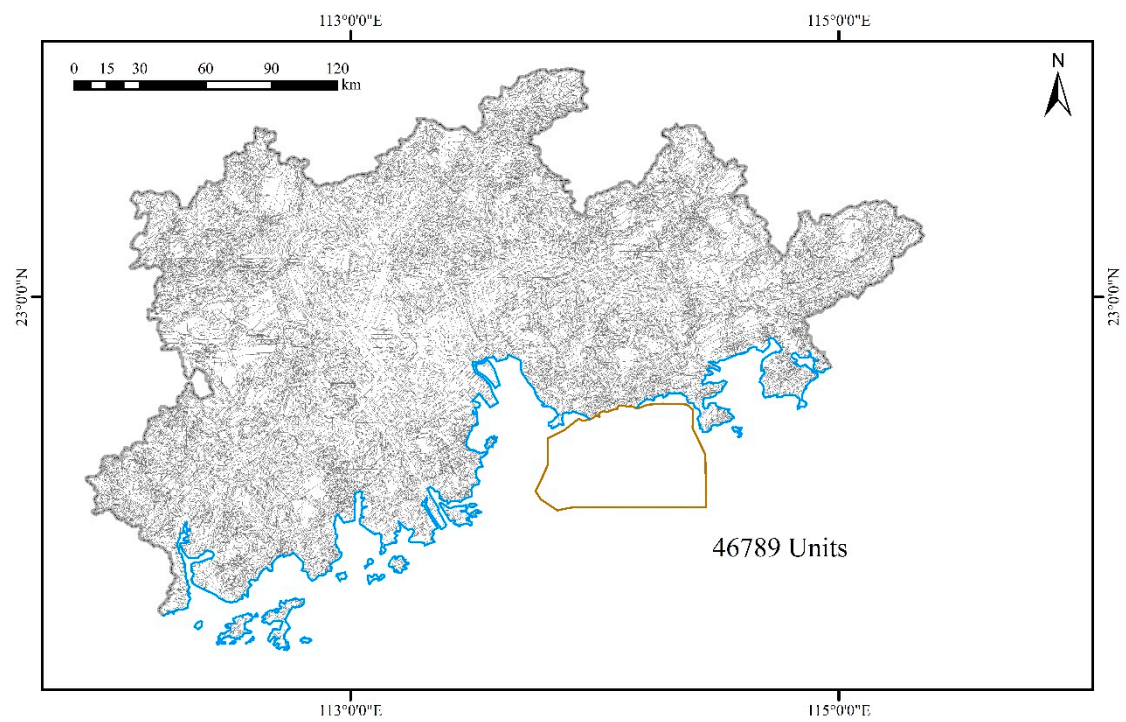

**Figure S2 Distribution map of assessment units of debris flow susceptibility**

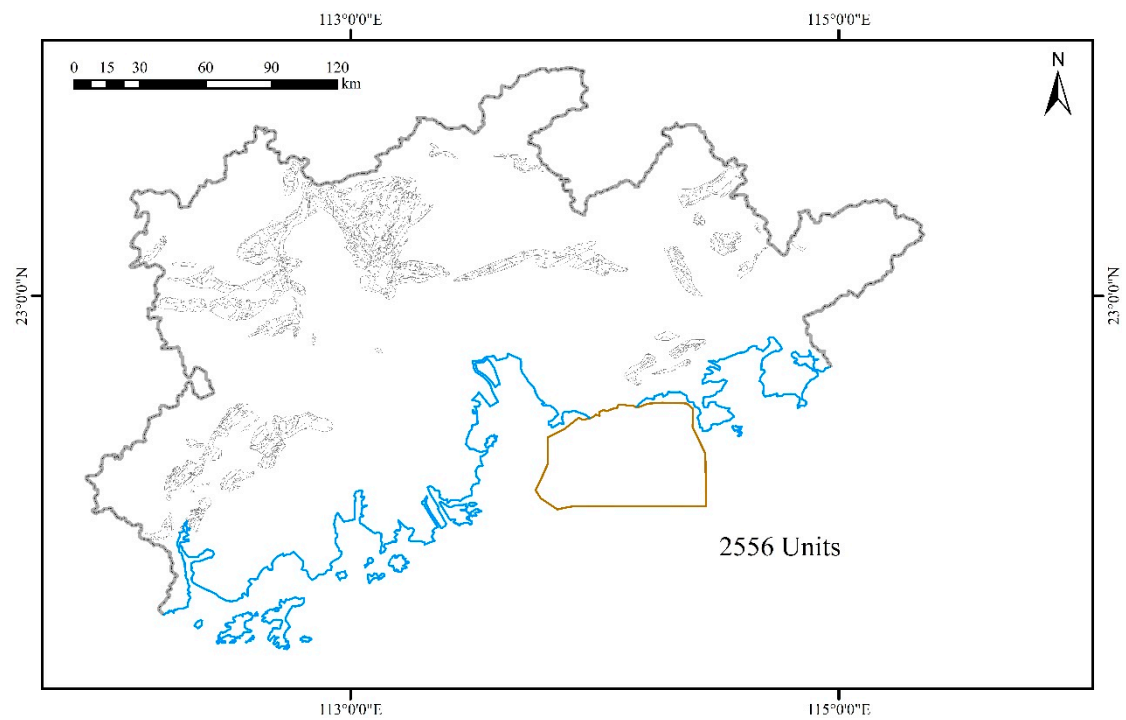

**Figure S3 Distribution map of assessment units of karst collapse susceptibility**

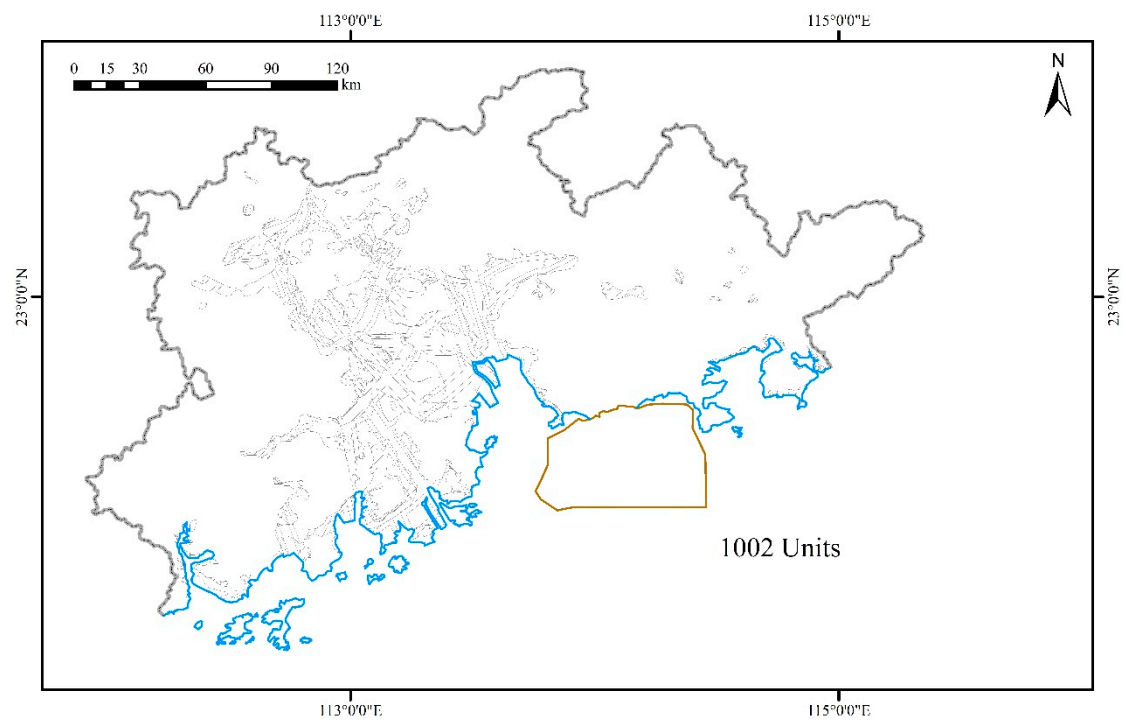

**Figure S4 Distribution map of assessment units of ground subsidence susceptibility**

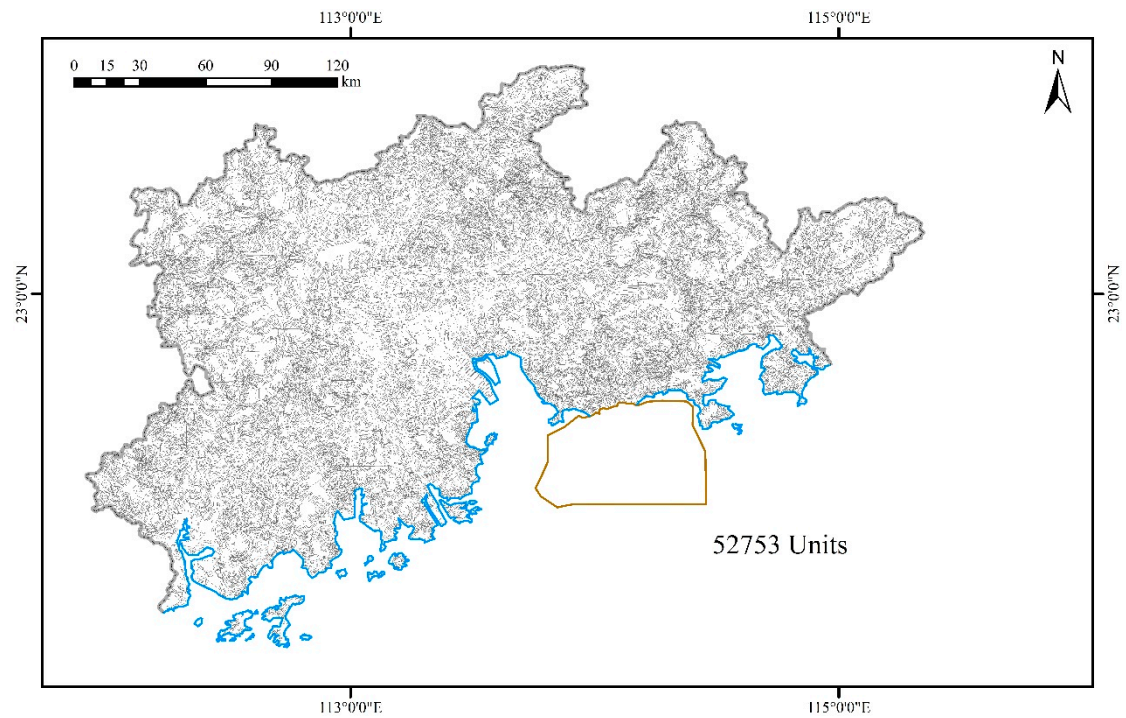

**Figure S5 Distribution map of assessment units of soil erosion susceptibility**

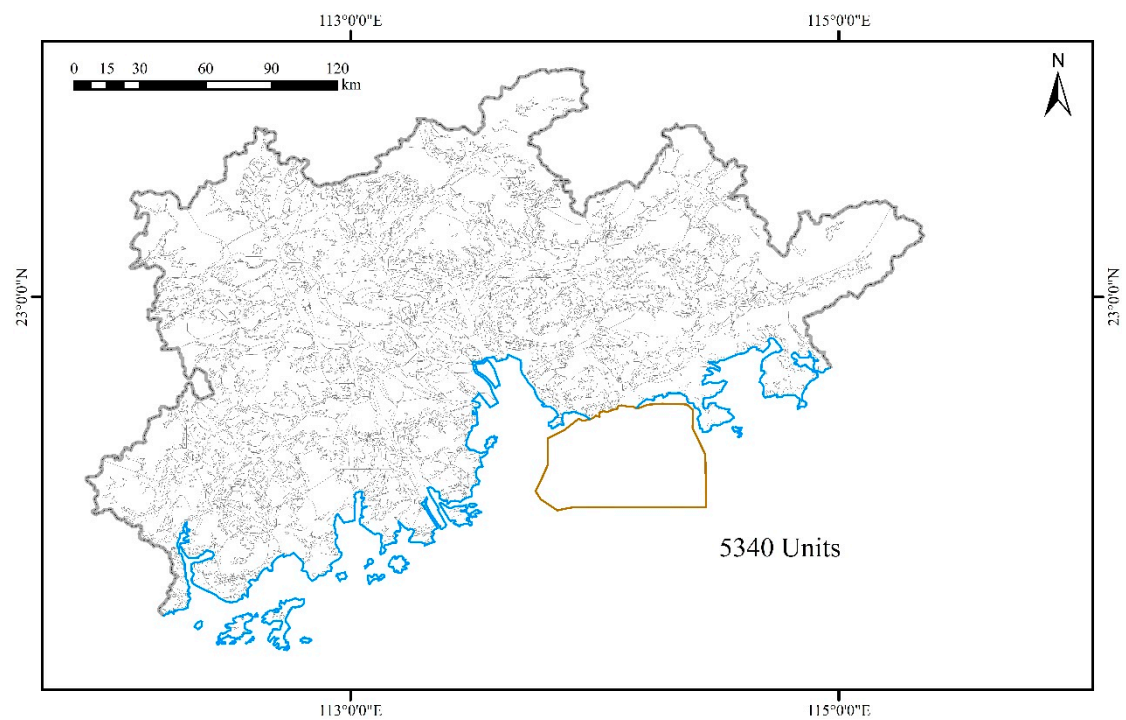

**Figure S6 Distribution map of assessment units of sea water intrusion susceptibility**

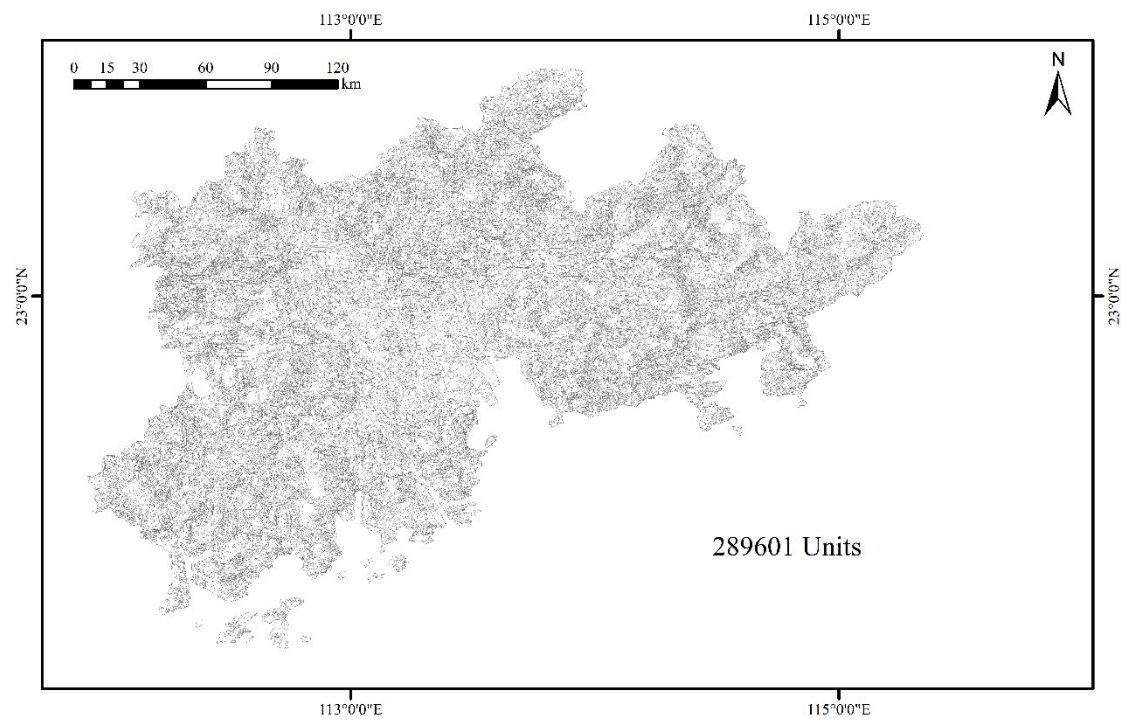

**Figure S7 Distribution map of assessment units of geo-environment vulnerability**



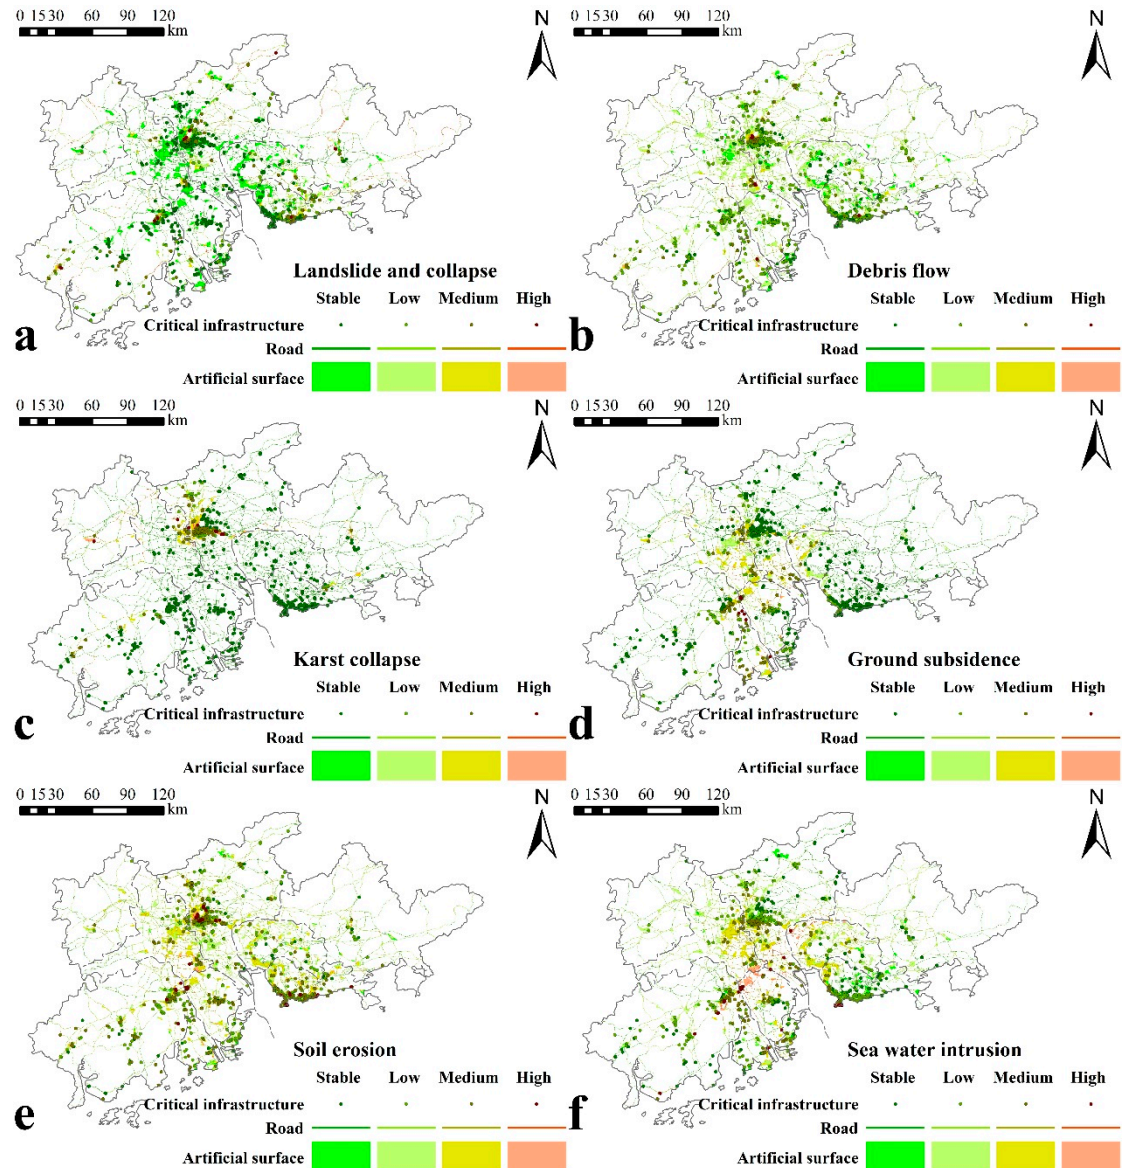

**Figure S8 Distribution of critical infrastructures, roads, and artificial surfaces in different susceptibility areas (a) landslide and collapse (b) debris flow (c) karst collapse (d) ground subsidence (e) soil erosion (f) sea water intrusion**

[illegible][illegible]

|                   |        |
|-------------------|--------|
| B <sub>28</sub>   | 0.1939 |
| <i>CI</i> =0.0260 |        |

**Table S3 Judgment matrix and constant weights of each indicator for karst collapse susceptibility**

| Indicator         | B <sub>31</sub> | B <sub>32</sub> | B <sub>33</sub> | B <sub>34</sub> | B <sub>35</sub> | Constant weight |
|-------------------|-----------------|-----------------|-----------------|-----------------|-----------------|-----------------|
| B <sub>31</sub>   |                 | 1               | 3               | 3               | 1               | 0.2794          |
| B <sub>32</sub>   |                 |                 | 3               | 3               | 1               | 0.2794          |
| B <sub>33</sub>   |                 |                 |                 | 1               | 1/2             | 0.1011          |
| B <sub>34</sub>   |                 |                 |                 |                 | 1/2             | 0.1011          |
| B <sub>35</sub>   |                 |                 |                 |                 |                 | 0.2392          |
| <i>CI</i> =0.0059 |                 |                 |                 |                 |                 |                 |

**Table S4 Judgment matrix and constant weights of each indicator for ground subsidence susceptibility**

| Indicator         | B <sub>41</sub> | B <sub>42</sub> | B <sub>43</sub> | B <sub>44</sub> | Constant weight |
|-------------------|-----------------|-----------------|-----------------|-----------------|-----------------|
| B <sub>41</sub>   |                 | 1               | 3               | 2               | 0.3564          |
| B <sub>42</sub>   |                 |                 | 2               | 2               | 0.3257          |
| B <sub>43</sub>   |                 |                 |                 | 1/2             | 0.1243          |
| B <sub>44</sub>   |                 |                 |                 |                 | 0.1936          |
| <i>CI</i> =0.0172 |                 |                 |                 |                 |                 |



**Table S5 Judgment matrix and constant weights of each indicator for soil erosion susceptibility**

| Indicator         | B <sub>51</sub> | B <sub>52</sub> | B <sub>53</sub> | B <sub>54</sub> | B <sub>55</sub> | B <sub>56</sub> | Constant weight |
|-------------------|-----------------|-----------------|-----------------|-----------------|-----------------|-----------------|-----------------|
| B <sub>51</sub>   |                 | 1               | 1/3             | 1/3             | 1/2             | 1               | 0.0905          |
| B <sub>52</sub>   |                 |                 | 1/3             | 1/3             | 1/2             | 1               | 0.0905          |
| B <sub>53</sub>   |                 |                 |                 | 1               | 2               | 3               | 0.2839          |
| B <sub>54</sub>   |                 |                 |                 |                 | 2               | 3               | 0.2839          |
| B <sub>55</sub>   |                 |                 |                 |                 |                 | 1               | 0.1484          |
| B <sub>56</sub>   |                 |                 |                 |                 |                 |                 | 0.1028          |
| <i>CI</i> =0.0072 |                 |                 |                 |                 |                 |                 |                 |

**Table S6 Judgment matrix and constant weights of each indicator for sea water intrusion susceptibility**

| Indicator         | B <sub>61</sub> | B <sub>62</sub> | B <sub>63</sub> | B <sub>64</sub> | Constant weight |
|-------------------|-----------------|-----------------|-----------------|-----------------|-----------------|
| B <sub>61</sub>   |                 | 1/2             | 1/3             | 1/2             | 0.1223          |
| B <sub>62</sub>   |                 |                 | 1/2             | 1               | 0.2270          |
| B <sub>63</sub>   |                 |                 |                 | 2               | 0.4236          |
| B <sub>64</sub>   |                 |                 |                 |                 | 0.2270          |
| <i>CI</i> =0.0039 |                 |                 |                 |                 |                 |

**Table S7 Variable weights of each indicator for landslide and collapse susceptibility**

| Unit                                                                                       | $x_1$ | $x_2$ | $x_3$ | $x_4$ | $x_5$ | $x_6$ | $x_7$ | $w'_1$ | $w'_2$ | $w'_3$ | $w'_4$ | $w'_5$ | $w'_6$ | $w'_7$ | $CPI$  |
|--------------------------------------------------------------------------------------------|-------|-------|-------|-------|-------|-------|-------|--------|--------|--------|--------|--------|--------|--------|--------|
| 1                                                                                          | 0.1   | 0.1   | 0.1   | 0.1   | 0.1   | 0.1   | 0.1   | 0.1265 | 0.1265 | 0.2427 | 0.1080 | 0.1170 | 0.0640 | 0.2249 | 0.1000 |
| 2                                                                                          | 0.1   | 0.1   | 0.1   | 0.1   | 0.1   | 0.3   | 0.1   | 0.1287 | 0.1190 | 0.2469 | 0.1098 | 0.1190 | 0.0479 | 0.2288 | 0.1096 |
| 3                                                                                          | 0.1   | 0.1   | 0.1   | 0.3   | 0.1   | 0.1   | 0.1   | 0.1302 | 0.1204 | 0.2498 | 0.0818 | 0.1204 | 0.0659 | 0.2315 | 0.1164 |
| .....                                                                                      |       |       |       |       |       |       |       |        |        |        |        |        |        |        |        |
| 54043                                                                                      | 0.9   | 0.7   | 0.9   | 0.9   | 0.7   | 0.9   | 0.7   | 0.1527 | 0.0884 | 0.2929 | 0.1303 | 0.0884 | 0.0772 | 0.1700 | 0.8306 |
| 54044                                                                                      | 0.9   | 0.7   | 0.9   | 0.9   | 0.9   | 0.7   | 0.7   | 0.1491 | 0.0864 | 0.2861 | 0.1273 | 0.1379 | 0.0472 | 0.1660 | 0.8401 |
| 54045                                                                                      | 0.9   | 0.7   | 0.9   | 0.9   | 0.9   | 0.9   | 0.7   | 0.1450 | 0.0840 | 0.2782 | 0.1238 | 0.1341 | 0.0734 | 0.1615 | 0.8509 |
| $w_1=0.1265$ $w_2=0.1170$ $w_3=0.2427$ $w_4=0.1080$ $w_5=0.1170$ $w_6=0.0640$ $w_7=0.2249$ |       |       |       |       |       |       |       |        |        |        |        |        |        |        |        |

**Table S8 Variable weights of each indicator for debris flow susceptibility**

| Unit | $x_1$ | $x_2$ | $x_3$ | $x_4$ | $x_5$ | $x_6$ | $x_7$ | $x_8$ | $w'_1$ | $w'_2$ | $w'_3$ | $w'_4$ | $w'_5$ | $w'_6$ | $w'_7$ | $w'_8$ | $CPI$ |
|------|-------|-------|-------|-------|-------|-------|-------|-------|--------|--------|--------|--------|--------|--------|--------|--------|-------|
|------|-------|-------|-------|-------|-------|-------|-------|-------|--------|--------|--------|--------|--------|--------|--------|--------|-------|

|                                                                                                                                                                                                       |     |     |     |     |     |     |     |     |     |        |        |        |        |        |        |        |        |        |
|-------------------------------------------------------------------------------------------------------------------------------------------------------------------------------------------------------|-----|-----|-----|-----|-----|-----|-----|-----|-----|--------|--------|--------|--------|--------|--------|--------|--------|--------|
| 1                                                                                                                                                                                                     | 0.1 | 0.1 | 0.1 | 0.1 | 0.1 | 0.1 | 0.1 | 0.1 | 0.1 | 0.0634 | 0.0739 | 0.1143 | 0.1233 | 0.0886 | 0.1487 | 0.1939 | 0.1939 | 0.1000 |
| 2                                                                                                                                                                                                     | 0.3 | 0.1 | 0.1 | 0.1 | 0.1 | 0.1 | 0.1 | 0.1 | 0.1 | 0.0474 | 0.0752 | 0.1163 | 0.1254 | 0.0901 | 0.1512 | 0.1972 | 0.1972 | 0.1095 |
| 3                                                                                                                                                                                                     | 0.1 | 0.3 | 0.1 | 0.1 | 0.1 | 0.1 | 0.1 | 0.1 | 0.1 | 0.0647 | 0.0554 | 0.1166 | 0.1258 | 0.0904 | 0.1517 | 0.1978 | 0.1978 | 0.1111 |
| .....                                                                                                                                                                                                 |     |     |     |     |     |     |     |     |     |        |        |        |        |        |        |        |        |        |
| 46787                                                                                                                                                                                                 | 0.7 | 0.7 | 0.7 | 0.9 | 0.1 | 0.9 | 0.9 | 0.9 | 0.9 | 0.0454 | 0.0530 | 0.0819 | 0.1411 | 0.0648 | 0.1701 | 0.2219 | 0.2219 | 0.8121 |
| 46788                                                                                                                                                                                                 | 0.7 | 0.3 | 0.9 | 0.9 | 0.7 | 0.9 | 0.9 | 0.7 | 0.7 | 0.0478 | 0.0417 | 0.1375 | 0.1483 | 0.0667 | 0.1788 | 0.2332 | 0.1460 | 0.8228 |
| 46789                                                                                                                                                                                                 | 0.3 | 0.7 | 0.9 | 0.9 | 0.7 | 0.9 | 0.9 | 0.7 | 0.7 | 0.0357 | 0.0556 | 0.1372 | 0.1480 | 0.0666 | 0.1785 | 0.2327 | 0.1458 | 0.8250 |
| w <sub>1</sub> =0.0634   w <sub>2</sub> =0.0739   w <sub>3</sub> =0.1143   w <sub>4</sub> =0.1233   w <sub>5</sub> =0.0886   w <sub>6</sub> =0.1487   w <sub>7</sub> =0.1939   w <sub>8</sub> =0.1939 |     |     |     |     |     |     |     |     |     |        |        |        |        |        |        |        |        |        |

**Table S9 Variable weights of each indicator for karst collapse susceptibility**

| Unit | $x_1$ | $x_2$ | $x_3$ | $x_4$ | $x_5$ | $w'_1$ | $w'_2$ | $w'_3$ | $w'_4$ | $w'_5$ | <i>CPI</i> |
|------|-------|-------|-------|-------|-------|--------|--------|--------|--------|--------|------------|
| 1    | 0.1   | 0.1   | 0.1   | 0.1   | 0.1   | 0.2793 | 0.2793 | 0.1011 | 0.1011 | 0.2392 | 0.1000     |
| 2    | 0.1   | 0.1   | 0.1   | 0.3   | 0.1   | 0.2870 | 0.2870 | 0.1039 | 0.0764 | 0.2457 | 0.1153     |

|           |     |           |     |           |     |           |        |           |        |        |        |
|-----------|-----|-----------|-----|-----------|-----|-----------|--------|-----------|--------|--------|--------|
| 3         | 0.1 | 0.1       | 0.3 | 0.3       | 0.1 | 0.2951    | 0.2951 | 0.0785    | 0.0785 | 0.2527 | 0.1314 |
| .....     |     |           |     |           |     |           |        |           |        |        |        |
| 2554      | 0.7 | 0.7       | 0.1 | 0.7       | 0.3 | 0.2965    | 0.2965 | 0.1094    | 0.1073 | 0.1904 | 0.5582 |
| 2555      | 0.7 | 0.7       | 0.1 | 0.1       | 0.7 | 0.2782    | 0.2782 | 0.1027    | 0.1027 | 0.2382 | 0.5768 |
| 2556      | 0.7 | 0.7       | 0.1 | 0.7       | 0.7 | 0.2788    | 0.2788 | 0.1029    | 0.1009 | 0.2387 | 0.6383 |
| <hr/>     |     |           |     |           |     |           |        |           |        |        |        |
| w1=0.2794 |     | w2=0.2794 |     | w3=0.1011 |     | w4=0.1011 |        | w5=0.2392 |        |        |        |
| <hr/>     |     |           |     |           |     |           |        |           |        |        |        |

**Table S10 Variable weights of each indicator for ground subsidence susceptibility**

| Unit | $x_1$ | $x_2$ | $x_3$ | $x_4$ | $w'_1$ | $w'_2$ | $w'_3$ | $w'_4$ | $CPI$  |
|------|-------|-------|-------|-------|--------|--------|--------|--------|--------|
| 1    | 0.1   | 0.1   | 0.1   | 0.1   | 0.3564 | 0.3257 | 0.1243 | 0.1936 | 0.1000 |
| 2    | 0.1   | 0.1   | 0.3   | 0.1   | 0.3685 | 0.3368 | 0.0945 | 0.2002 | 0.1189 |
| 3    | 0.1   | 0.1   | 0.1   | 0.3   | 0.3756 | 0.3433 | 0.1310 | 0.1501 | 0.1300 |

|                                                                 |     |     |     |     |        |        |        |        |        |
|-----------------------------------------------------------------|-----|-----|-----|-----|--------|--------|--------|--------|--------|
| 1000                                                            | 0.7 | 0.7 | 0.1 | 0.7 | 0.3555 | 0.3249 | 0.1265 | 0.1931 | 0.6241 |
| 1001                                                            | 0.7 | 0.7 | 0.3 | 0.7 | 0.3678 | 0.3361 | 0.0962 | 0.1998 | 0.6615 |
| 1002                                                            | 0.7 | 0.7 | 0.7 | 0.7 | 0.3564 | 0.3257 | 0.1243 | 0.1936 | 0.7000 |
| <hr/>                                                           |     |     |     |     |        |        |        |        |        |
| $w_1=0.3564 \quad w_2=0.3257 \quad w_3=0.1243 \quad w_4=0.1936$ |     |     |     |     |        |        |        |        |        |
| <hr/>                                                           |     |     |     |     |        |        |        |        |        |

**Table S11 Variable weights of each indicator for soil erosion susceptibility**

| Unit  | $x_1$ | $x_2$ | $x_3$ | $x_4$ | $x_5$ | $x_6$ | $w'_1$ | $w'_2$ | $w'_3$ | $w'_4$ | $w'_5$ | $w'_6$ | <i>CPI</i> |
|-------|-------|-------|-------|-------|-------|-------|--------|--------|--------|--------|--------|--------|------------|
| 1     | 0.1   | 0.1   | 0.1   | 0.1   | 0.1   | 0.1   | 0.0905 | 0.0905 | 0.2839 | 0.2839 | 0.1484 | 0.1028 | 0.1000     |
| 2     | 0.1   | 0.3   | 0.1   | 0.1   | 0.1   | 0.1   | 0.0927 | 0.0682 | 0.2909 | 0.2909 | 0.1520 | 0.1053 | 0.1136     |
| 3     | 0.1   | 0.1   | 0.1   | 0.1   | 0.1   | 0.3   | 0.0930 | 0.0930 | 0.2918 | 0.2918 | 0.1525 | 0.0777 | 0.1155     |
| ..... |       |       |       |       |       |       |        |        |        |        |        |        |            |
| 52751 | 0.7   | 0.9   | 0.9   | 0.9   | 0.7   | 0.3   | 0.0662 | 0.1057 | 0.3316 | 0.3316 | 0.1086 | 0.0564 | 0.8312     |
| 52752 | 0.3   | 0.9   | 0.9   | 0.9   | 0.9   | 0.3   | 0.0474 | 0.1008 | 0.3163 | 0.3163 | 0.1653 | 0.0538 | 0.8393     |

|                                                                                           |     |     |     |     |     |     |        |        |        |        |        |        |        |
|-------------------------------------------------------------------------------------------|-----|-----|-----|-----|-----|-----|--------|--------|--------|--------|--------|--------|--------|
| 52753                                                                                     | 0.7 | 0.9 | 0.9 | 0.9 | 0.9 | 0.3 | 0.0622 | 0.0993 | 0.3114 | 0.3114 | 0.1628 | 0.0530 | 0.8558 |
| <hr/> $w_1=0.0905$ $w_2=0.0905$ $w_3=0.2839$ $w_4=0.2839$ $w_5=0.1484$ $w_6=0.1028$ <hr/> |     |     |     |     |     |     |        |        |        |        |        |        |        |

**Table S12 Variable weights of each indicator for sea water susceptibility**

| <b>Unit</b>  | <b><math>x_1</math></b> | <b><math>x_2</math></b> | <b><math>x_3</math></b> | <b><math>x_4</math></b> | <b><math>w'_1</math></b> | <b><math>w'_2</math></b> | <b><math>w'_3</math></b> | <b><math>w'_4</math></b> | <b><i>CPI</i></b> |
|--------------|-------------------------|-------------------------|-------------------------|-------------------------|--------------------------|--------------------------|--------------------------|--------------------------|-------------------|
| 1            | 0.1                     | 0.1                     | 0.1                     | 0.1                     | 0.1223                   | 0.2270                   | 0.4236                   | 0.2270                   | 0.1000            |
| 2            | 0.3                     | 0.1                     | 0.1                     | 0.1                     | 0.0930                   | 0.2346                   | 0.4378                   | 0.2346                   | 0.1186            |
| 3            | 0.1                     | 0.3                     | 0.1                     | 0.1                     | 0.1301                   | 0.1776                   | 0.4507                   | 0.2415                   | 0.1355            |
| .....        |                         |                         |                         |                         |                          |                          |                          |                          |                   |
| 5338         | 0.9                     | 0.3                     | 0.9                     | 0.7                     | 0.1539                   | 0.1342                   | 0.5330                   | 0.1789                   | 0.7837            |
| 5339         | 0.9                     | 0.9                     | 0.7                     | 0.7                     | 0.1616                   | 0.2999                   | 0.3506                   | 0.1879                   | 0.7923            |
| 5340         | 0.9                     | 0.9                     | 0.9                     | 0.7                     | 0.1336                   | 0.2481                   | 0.4629                   | 0.1554                   | 0.8689            |
| <hr/>        |                         |                         |                         |                         |                          |                          |                          |                          |                   |
| $w_1=0.3564$ |                         | $w_2=0.3257$            |                         | $w_3=0.1243$            |                          | $w_4=0.1936$             |                          |                          |                   |



**Table S13 Distribution of critical infrastructures, roads, and artificial surfaces in different susceptibility areas**

| Geo-hazard             |                                       | Stable   | Low      | Medium  | High    |
|------------------------|---------------------------------------|----------|----------|---------|---------|
| Landslide and collapse | Critical infrastructure               | 533      | 129      | 122     | 13      |
|                        | Road (km)                             | 20061.09 | 6075.53  | 3998.62 | 1139.11 |
|                        | Artificial surface (km <sup>2</sup> ) | 1912.45  | 342.03   | 195.20  | 30.08   |
| Debris flow            | Critical infrastructure               | 154      | 560      | 76      | 7       |
|                        | Road (km)                             | 7927.67  | 20370.11 | 2579.86 | 396.71  |
|                        | Artificial surface (km <sup>2</sup> ) | 581.77   | 1683.83  | 193.33  | 20.83   |
| Karst collapse         | Critical infrastructure               | 584      | 64       | 134     | 15      |
|                        | Road (km)                             | 25520.01 | 1635.63  | 3547.43 | 571.28  |
|                        | Artificial surface (km <sup>2</sup> ) | 1982.90  | 100.12   | 337.70  | 59.04   |
| Ground subsidence      | Critical infrastructure               | 461      | 205      | 122     | 9       |

|                     |                                       |          |          |         |         |
|---------------------|---------------------------------------|----------|----------|---------|---------|
|                     | Road (km)                             | 20940.59 | 5132.19  | 4946.04 | 255.53  |
|                     | Artificial surface (km <sup>2</sup> ) | 1306.11  | 619.67   | 535.96  | 18.01   |
|                     | Critical infrastructure               | 55       | 380      | 309     | 53      |
| Soil erosion        | Road (km)                             | 4749.97  | 17506.76 | 8273.81 | 743.81  |
|                     | Artificial surface (km <sup>2</sup> ) | 112.39   | 1018.23  | 1219.19 | 129.94  |
|                     | Critical infrastructure               | 165      | 392      | 207     | 33      |
| Sea water intrusion | Road (km)                             | 8639.36  | 14594.27 | 6744.59 | 1296.13 |
|                     | Artificial surface (km <sup>2</sup> ) | 279.08   | 1129.18  | 904.49  | 167.02  |
